# Supplementary material for: Voriconazole Adjustment for Liver Dysfunction (VALID): From Population Pharmacokinetic Model to the Real-World
Source: Research Square preprint supplement (doi:10.21203/rs.3.rs-5720035/v1), 2025-01-01
Supplement: Supplementary file 1 [file 155e17516803a89b821c7144.docx]

Table 5. Model Comparison Result

| **Model** | **Training MAE** | **Training RMSE** | **Testing MAE** | **Testing RMSE** |
| --- | --- | --- | --- | --- |
| Linear Regression | 1.578736 | 2.055969 | 1.623758 | 2.069742 |
| Decision Tree | 0.000000 | 0.000000 | 2.165426 | 2.811887 |
| Optimized Decision Tree | 1.614214 | 2.114201 | 1.834554 | 2.347003 |
| Random Forest | 0.647650 | 0.853882 | 1.621641 | 2.068454 |
| Optimized Random Forest | 0.775170 | 1.046603 | 1.619110 | 2.066883 |
| XGBoost | 2.039716 | 2.683645 | 1.944431 | 2.447639 |
| XGBoost (Reduced) | 1.200733 | 1.813668 | 1.771304 | 2.309149 |

Note: The "Training MAE" and "Training RMSE" columns represent the mean absolute error and root mean squared error on the training set, respectively, while the "Testing MAE" and "Testing RMSE" columns indicate the corresponding metrics on the test set.
