# Supplementary material for: Voriconazole Adjustment for Liver Dysfunction (VALID): From Population Pharmacokinetic Model to the Real-World
Source: Research Square preprint supplement (doi:10.21203/rs.3.rs-5720035/v1), 2025-01-01
Supplement: Supplementary file 2 [file 243ae6cee417302b9c6f339f.docx]

Table 3. Statistics of VRZ related adverse events

| Adverse event category | VALID Group (Number, %) | Control Group (Number, %) |
| --- | --- | --- |
| Discontinued due to high VRZ trough concentration | 2（5.1） | 8（20.5） |
| Liver injury | 0（0.0） | 1（2.6） |
| Rash | 1（2.6） | 1（2.6） |
| Gastrointestinal reaction | 1（2.6） | 2（5.1） |
| Nephrotoxicity | 0（0.0） | 2（5.1） |
| Progressive decline of platelets | 2（5.1） | 0（0.0） |
| Decreased hearing | 0（0.0） | 1（2.6） |
| Total | 6（15.4） | 15（38.5） |
