# Supplementary material for: Voriconazole Adjustment for Liver Dysfunction (VALID): From Population Pharmacokinetic Model to the Real-World
Source: Research Square preprint supplement (doi:10.21203/rs.3.rs-5720035/v1), 2025-01-01
Supplement: Supplementary file 3 [file 2ffb53c281daddbaa552d134.docx]

Table 2. Target attainment of initial VRZ trough concentration

|  | VALID Group | Control Group | Total | *P*-Value |
| --- | --- | --- | --- | --- |
| **Initial Trough Concentration** | | | | |
| Target | 35 | 19 | 54 | 0.0004 |
| Out of Target | 4 | 20 | 24 |
| Total | 39 | 39 | 78 |
| **Overall Trough Concentration** | | | | |
| Target | 62 | 34 | 96 | 0.0001 |
| Out of Target | 9 | 33 | 42 |
| Total | 71 | 67 | 138 |
