# Supplementary material for: Voriconazole Adjustment for Liver Dysfunction (VALID): From Population Pharmacokinetic Model to the Real-World
Source: Research Square preprint supplement (doi:10.21203/rs.3.rs-5720035/v1), 2025-01-01
Supplement: Supplementary file 4 [file 362eae44444df9710a654f51.docx]

Table 1. Baseline characteristic of inclusion patients after propensity score matching

| Parameters1 | VALD Group (n=39) | Control group (n=39) | *P*-Value |
| --- | --- | --- | --- |
| Gender (Male, %) | 27 （69.2%） | 33（84.6%） | 0.1069 |
| Child-Pugh class（A：B：C） | 2：17：20 | 4：12：22 | 0.4660 |
| MELD Score | 15.6±7.8*  （17.0，9.1~20.9） | 17.3±7.3*  （18.4，12.3~21.2） | 0.3661 |
| Age (Year) | 57.9±11.7*  （56.0，49.0~69.0） | 53.7±15.0*  （56.0，46.0~63.0） | 0.1763 |
| Body Weight (kg) | 62.3±13.1*  （64.0，52.0~71.0） | 58.9±11.0*  （60.0，50.0~66.5） | 0.2249 |
| ALT（U/L） | 101.4±295.4  （27.7，17.6~61.0） | 70.7±70.0  （39.1，27.5~86.7） | 0.0778 |
| AST（U/L） | 121.1±311.6  （55.7，28.1~97.7） | 84.0±66.2  （66.4，36.4~115.6） | 0.2872 |
| TP（g/L） | 59.2±8.4*  （57.5，52.6~65.0） | 59.8±8.9*  （59.7，54.1~66.0） | 0.7420 |
| ALB（g/L） | 29.4±4.5  （29.6，24.9~33.0） | 29.6±4.9*  （30.1，26.0~33.1） | 0.9006 |
| GLO（g/L） | 29.7±7.9*  （28.5，24.8~33.8） | 30.2±8.2*  （29.4，23.5~35.6） | 0.8022 |
| TBIL（μmol/L） | 114.5±144.0  （48.2，22.5~138.5） | 157.7±157.9  （126.1，36.8~237.6） | 0.1109 |
| DBIL（μmol/L） | 78.4±105.2  （25.5，14.6~97.1） | 113.7±122.6  （81.3，23.2~173.9） | 0.1087 |
| TBA（μmol/L） | 110.3±121.3  （74.6，24.1~172.9） | 191.0±222.4  （135.8，19.1~265.8） | 0.1573 |
| BUN（mmol/L） | 9.26±7.23  （7.11，4.58~9.49） | 9.37±7.49  （5.75，4.29~10.98） | 0.6144 |
| CREA（μmol/L） | 90.0±57.4  （65.8，58.9~101.5） | 104.8±83.6  （80.2，56.7~104.2） | 0.7026 |
| UA（μmol/L） | 284.5±197.5  （215.0，153.8~399.9） | 258.6±151.9  （204.0，140.4~367.3） | 0.6909 |
| PT（s） | 20.6±5.9  （19.6，16.9~22.3） | 19.2±4.7*  （18.1，15.8~21.9） | 0.2352 |
| INR | 1.80±0.70  （1.69，1.37~1.97） | 1.63±0.49  （1.47，1.23~1.95） | 0.2292 |
| PTA（%） | 50.2±16.8*  （46.0，40.0~63.0） | 55.8±22.1  （54.0，37.8~70.3） | 0.3751 |
| PT ratio | 1.57±0.45  （1.50，1.28~1.70） | 1.46±0.35*  （1.36，1.18~1.71） | 0.2252 |

Table 1. Baseline characteristic of inclusion patients after propensity score matching

| Parameters1 | VALD Group (n=39) | Control group (n=39) | *P*-Value |
| --- | --- | --- | --- |
| WBC（×109/L） | 5.82±3.65  （4.69，3.43~7.29） | 8.08±6.47  （5.95，3.78~10.52） | 0.2044 |
| RBC（×1012/L） | 2.86±0.70*  （2.78，2.41~3.19） | 2.88±0.71*  （2.76，2.37~3.44） | 0.9030 |
| PLT（×109/L） | 93.7±66.5  （70.0，40.0~130.0） | 98.3±76.7  （77.0，58.0~123.0） | 0.4011 |
| HGB（g/L） | 92.2±23.5*  （90.0，74.0~104.0） | 92.1±22.8*  （87.0，75.0~110.0） | 0.9961 |
| NEUT#（×109/L） | 4.40±3.42  （3.20，2.28~6.04） | 6.23±5.45  （4.06，2.27~8.47） | 0.1530 |
| NEUT%（%） | 71.2±12.0*  （69.3，64.6~80.0） | 72.5±14.4  （75.0，59.4~86.0） | 0.6350 |
| LYM#（×109/L） | 0.91±0.56  （0.85，0.50~1.14） | 1.06±1.15  （0.80，0.58~1.24） | 0.6893 |
| LYM%（%） | 18.6±10.1*  （17.7，11.3~24.1） | 17.0±11.5  （13.7，7.9~25.5） | 0.3605 |
| PCT（μg/L） | 1.071±1.532  （0.330，0.158~1.545） | 1.003±1.106  （0.659，0.368~1.473） | 0.2543 |
| CRP（mg/L） | 41.27±46.99  （20.78，10.42~62.24） | 27.62±24.30  （23.39，8.87~36.68） | 0.6858 |

1 Mean ± SD (Median, IQR).

* Shows that the variable is normal distribution.
