# Supplementary material for: Voriconazole Adjustment for Liver Dysfunction (VALID): From Population Pharmacokinetic Model to the Real-World
Source: Research Square preprint supplement (doi:10.21203/rs.3.rs-5720035/v1), 2025-01-01
Supplement: Supplementary file 6 [file 7deec13f9ef30eb411bd4000.docx]

**Supplementary Figure 1: Correlation Matrix Heatmap of Clinical and Laboratory Parameters**

The figure illustrates the correlation coefficients between various clinical and laboratory parameters, including Dose, C, MELD, TBIL, DBIL, TBA, PT, INR, PT%, PT Ratio, RBC, and PLT. The strength and direction of correlations are represented by color gradients, with red indicating positive correlations and blue indicating negative correlations. The color intensity reflects the strength of the correlation.
